# Supplementary material for: Genome-wide identification and characterization of gibberellin metabolic and signal transduction (GA MST) pathway mediating seed and berry development (SBD) in grape (Vitis vinifera L.)
Source: PubMed Central journal article supplement (PMC7441673; doi:10.1186/s12870-020-02591-1), 2020-08-21
Supplement: 12870_2020_2591_MOESM1_ESM.pdf [file 12870_2020_2591_MOESM1_ESM.pdf]

Additional file 1:Table S1 The gene expression patterns of GA MST pathway genes in four stages of grape SBD.

| GA metabolic pathway |                     |        |                                       |             |                          |               |             |                                  |                    |                                |                     |  |
|----------------------|---------------------|--------|---------------------------------------|-------------|--------------------------|---------------|-------------|----------------------------------|--------------------|--------------------------------|---------------------|--|
| #Gene                | Abbreviation        | Length | Function                              | Green-RPKM  | Stone hardening-<br>RPKM | Veraison-RPKM | Ripe-RPKM   | Veraison/Stone<br>hardening Log2 | Ripe/veraison log2 | Stone hardening/<br>Green log2 | Ripe/Green log2     |  |
| VIT_215s0046g02550   | <i>VvGA20ox1-B1</i> | 987    | gibberellin 20 oxidase 1-B-like       | 1.061963108 | 0.027319153              | 0.023253818   | 0.024501819 | -0.232445147                     | 0.075421226        | -5.2806770768212               | -5.43770099799371   |  |
| VIT_216s0050g00640   | <i>VvGA20ox1-B2</i> | 1178   | gibberellin 20 oxidase 1-B-like       | 0.023       | 0.045779294              | 0.019483462   | 0.041058226 | -1.232445147                     | 1.075421226        | 0.993061351149903              | 0.836037429977386   |  |
| VIT_203s0063g01150   | <i>VvGA20ox1-1</i>  | 1292   | gibberellin 20 oxidase 1-like         | 525.3658923 | 41.03036542              | 3.766038631   | 7.599394578 | -3.445572299                     | 1.012836689        | -3.67855863289385              | -6.11129424322177   |  |
| VIT_202s0234g00010   | <i>VvGA20ox1-2</i>  | 1074   | gibberellin 20 oxidase 1-like         | 0.023       | 0.025106149              | 0.021370129   | 0.022517035 | -0.232445147                     | 0.075421226        | 0.126406896994952              | -0.0306170241775667 |  |
| VIT_209s0002g05290   | <i>VvGA20ox1-3</i>  | 963    | gibberellin 20 oxidase 1-like         | 4.233074983 | 0.112000017              | 0.023833352   | 0.100449824 | -2.232445147                     | 2.075421226        | -5.24013518576528              | -5.3971591069378    |  |
| VIT_218s0001g01390   | <i>VvGA20ox2-1</i>  | 1264   | gibberellin 20 oxidase 2-like         | 0.023       | 0.021332282              | 0.018157847   | 0.019132354 | -0.232445147                     | 0.075421226        | -0.10859557319674              | -0.26561949436926   |  |
| VIT_215s0048g01320   | <i>VvGA20ox2-2</i>  | 1185   | gibberellin 20 oxidase 2-like         | 8.461299426 | 0.022754434              | 0.01936837    | 0.040815688 | -0.232445147                     | 1.075421226        | -8.53858773654743              | -7.69561165771995   |  |
| VIT_204s0044g01520   | <i>VvGA20ox2-3</i>  | 1252   | gibberellin 20 oxidase 2-like         | 7.404239581 | 0.021536745              | 0.018331884   | 0.019315731 | -0.232445147                     | 0.075421226        | -8.42540757826939              | -8.5824314994419    |  |
| VIT_204s0044g01650   | <i>VvGA20ox2-4</i>  | 1217   | gibberellin 20 oxidase 2-like         | 9.518360476 | 1.28505525               | 0.188590949   | 0.019871237 | -2.768498048                     | -3.246506869       | -2.88888270391234              | -8.90388762021243   |  |
| VIT_209s0002g05280   | <i>VvGA20ox3-1</i>  | 1236   | gibberellin 20 oxidase 3-like         | 5.290126097 | 0.56720397               | 0.01856919    | 0.019565773 | -4.932884865                     | 0.075421226        | -3.22136257475204              | -8.07882621406565   |  |
| VIT_209s0002g05320   | <i>VvGA20ox3-2</i>  | 942    | gibberellin 20 oxidase 3-like         | 81.39874646 | 0.028624208              | 0.024364669   | 0.025672288 | -0.232445147                     | 0.075421226        | -11.4735550753701              | -11.6305789965427   |  |
| VIT_216s0022g02310   | <i>VvGA20ox</i>     | 1321   | gibberellin 20-oxidase                | 9.518360476 | 0.122470874              | 0.034748703   | 0.036613619 | -1.817407648                     | 0.075421226        | -6.28020249685185              | -8.02218891874553   |  |
| VIT_209s0002g05340   | <i>VvGA3ox1-1</i>   | 1286   | gibberellin 3-beta-dioxygenase 1-like | 0.023       | 0.020967344              | 0.017847215   | 0.018805051 | -0.232445147                     | 0.075421226        | -0.133489752347587             | -0.290513673520099  |  |
| VIT_204s0008g04940   | <i>VvGA3ox1-2</i>   | 1174   | gibberellin 3-beta-dioxygenase 1-like | 2.118998898 | 0.091870542              | 0.039099691   | 0.082396235 | -1.232445147                     | 1.075421226        | -4.52763668385035              | -4.68466060502287   |  |
| VIT_209s0002g05300   | <i>VvGA3ox1-3</i>   | 1190   | gibberellin 3-beta-dioxygenase 1-like | 2.118998898 | 0.022658827              | 0.01928699    | 0.020322097 | -0.232445147                     | 0.075421226        | -6.5471658489356               | -6.70418977010812   |  |
| VIT_209s0002g05270   | <i>VvGA3ox1-4</i>   | 1297   | gibberellin 3-beta-dioxygenase 1-like | 193.4475997 | 0.020789517              | 0.017695851   | 0.074582252 | -0.232445147                     | 2.075421226        | -13.1837989357548              | -11.3408228569273   |  |
| VIT_209s0002g05350   | <i>VvGA3ox3</i>     | 1022   | gibberellin 3-beta-dioxygenase 3-like | 4.233074983 | 6.279288634              | 0.022457454   | 0.023662715 | -8.127262911                     | 0.075421226        | 0.568895084448501              | -7.48294660003196   |  |
| VIT_204s0008g04920   | <i>VvGA3ox4-1</i>   | 1299   | gibberellin 3-beta-dioxygenase 4-like | 1227.2568   | 97.39423202              | 11.16655863   | 5.287186911 | -3.124651697                     | -1.078612403       | -3.65545701603598              | -7.85872111573233   |  |
| VIT_204s0044g02010   | <i>VvGA3ox4-2</i>   | 929    | gibberellin 3-beta-dioxygenase 4-like | 527.4800215 | 11.02940966              | 11.90810753   | 0.026031534 | 0.110588581                      | -8.83746811        | -5.57968897380796              | -14.3065685033114   |  |

|                    |                   |      |                                       |             |             |             |             |              |              |                   |                    |
|--------------------|-------------------|------|---------------------------------------|-------------|-------------|-------------|-------------|--------------|--------------|-------------------|--------------------|
| VIT_202s0025g03440 | <i>IvGA3ox4-3</i> | 1199 | gibberellin 3-beta-dioxygenase 4-like | 10.57542238 | 0.179909953 | 0.019142217 | 0.020169554 | -3.232445147 | 0.075421226  | -5.87729647708426 | -9.03432039825678  |
| VIT_219s0140g00120 | <i>IvGA2ox1-1</i> | 1223 | gibberellin 2-beta-dioxygenase 1-like | 763.205432  | 29.05850977 | 1.613925255 | 3.519727327 | -4.170315048 | 1.124889902  | -4.71503881637343 | -7.76046396158761  |
| VIT_213s0067g01150 | <i>IvGA2ox1-2</i> | 1296 | gibberellin 2-beta-dioxygenase 1-like | 293.8687397 | 28.62844883 | 18.06369508 | 15.26383901 | -0.664356465 | -0.242975178 | -3.35965049196654 | -4.2669821348994   |
| VIT_219s0140g00140 | <i>IvGA2ox1-3</i> | 1138 | gibberellin 2-beta-dioxygenase 1-like | 106.7682986 | 26.7744505  | 1.210097634 | 3.825125756 | -4.467661609 | 1.660383727  | -1.99555447757746 | -4.80283235972286  |
| VIT_205s0077g00520 | <i>IvGA2ox2-1</i> | 1187 | gibberellin 2-beta-dioxygenase 2-like | 82.45581115 | 15.94669832 | 2.474974189 | 8.434611756 | -2.687772368 | 1.768908184  | -2.3703634203204  | -3.28922760429816  |
| VIT_207s0005g01920 | <i>IvGA2ox2-2</i> | 1008 | gibberellin 2-beta-dioxygenase 2-like | 0.023       | 0.026750004 | 0.022769364 | 0.023991364 | -0.232445147 | 0.075421226  | 0.217905251480445 | 0.0608813303079285 |
| VIT_209s0002g05310 | <i>IvGA2ox2-3</i> | 813  | gibberellin 2-beta-dioxygenase 2-like | 0.023       | 0.033166057 | 0.02823065  | 0.02974575  | -0.232445147 | 0.075421226  | 0.528073632905336 | 0.371049711732818  |
| VIT_201s0010g01650 | <i>IvGA2ox3-1</i> | 1092 | gibberellin 2-beta-dioxygenase 8-like | 6.347181498 | 0.098769246 | 0.021017874 | 0.088583498 | -2.232445147 | 2.075421226  | -6.00591039179329 | -6.16293431296581  |
| VIT_219s0177g00030 | <i>IvGA2ox3-2</i> | 1287 | gibberellin 2-beta-dioxygenase 8-like | 10.57542238 | 2.514126259 | 1.426667814 | 2.029367418 | -0.817407648 | 0.508380633  | -2.07258627628222 | -2.38161329089979  |
| VIT_210s0116g00410 | <i>IvGA2ox3-3</i> | 1628 | gibberellin 2-beta-dioxygenase 8-like | 155.3932727 | 0.132501249 | 0.056391937 | 2.198481369 | -1.232445147 | 5.284874592  | -10.1957023752004 | -6.14327293074397  |
| VIT_206s0004g06790 | <i>IvGA2ox3-4</i> | 1197 | gibberellin 2-beta-dioxygenase 8-like | 156.4503373 | 10.54231741 | 1.112103651 | 0.020203254 | -3.244828872 | -5.782559769 | -3.89144082986593 | -12.9188294706219  |
| VIT_210s0003g03490 | <i>IvGA2ox</i>    | 1191 | gibberellin 2-beta-dioxygenase-like   | 132.1378504 | 5.071315639 | 1.271872559 | 0.324880538 | -1.99540595  | -1.968972893 | -4.70353989977196 | -8.66791874300208  |

GA signal transduction pathway

| #Gene              | Abbreviation    | Length | Function                                                                                          | Green-RPKM  | Stone hardening<br>-RPKM | Veraison-RPKM | Ripe-RPKM   | Veraison/Stone<br>hardening Log2 | Ripe/veraison log2 | Stone<br>hardening/Green log2 | Ripe/Green log2   |
|--------------------|-----------------|--------|---------------------------------------------------------------------------------------------------|-------------|--------------------------|---------------|-------------|----------------------------------|--------------------|-------------------------------|-------------------|
| VIT_213s0067g01630 | <i>IvGAMYB1</i> | 2516   | transcription factor GAMYB-like                                                                   | 151.1650141 | 3.408010061              | 1.550778274   | 1.614782818 | -0.232445147                     | 0.075421226        | -5.4710508731757              | -6.54864032685382 |
| VIT_206s0009g02480 | <i>IvGAMYB2</i> | 1932   | transcription factor GAMYB-like                                                                   | 73.99929366 | 2.12139163               | 1.164207458   | 0.275379136 | -0.232445147                     | 0.075421226        | -5.12442861376515             | -8.06994842974396 |
|                    |                 |        | Lateral Root Primordium type 1                                                                    |             |                          |               |             |                                  |                    |                               |                   |
| VIT_203s0038g00310 | <i>IvSHI</i>    | 1274   | C-terminal; Protein of unknown function<br>DUF702; Zinc finger lateral root<br>primordium type 1; | 1.061963108 | 0.259269271              | 0.03678128    | 0.038755281 | -0.647482647                     | -4.094503775       | -2.03421052050589             | -4.77619694239957 |
| VIT_204s0008g05880 | <i>IvPKL</i>    | 4688   | CHD3-type chromatin-remodeling<br>factor PICKLE-like                                              | 699.7815547 | 2.749316121              | 0.274164896   | 0.588075008 | 0.157592679                      | 0.201739941        | -7.99168802750468             | -10.2166887424932 |
| VIT_208s0007g02910 | <i>IvSPY1</i>   | 3344   | probable<br>UDP-N-acetylglucosamine-peptide                                                       | 903.7950264 | 14.06256675              | 5.257435148   | 16.8502026  | -2.817407648                     | 0.075421226        | -6.00606376854161             | -5.74515777494942 |

|                    |                 |      |                                                                     |             |             |             |             |                    |                        |                    |                    |  |
|--------------------|-----------------|------|---------------------------------------------------------------------|-------------|-------------|-------------|-------------|--------------------|------------------------|--------------------|--------------------|--|
|                    |                 |      | N-acetylglucosaminyltransferase                                     |             |             |             |             |                    |                        |                    |                    |  |
|                    |                 |      | SPINDLY-like                                                        |             |             |             |             |                    |                        |                    |                    |  |
|                    |                 |      | probable                                                            |             |             |             |             |                    |                        |                    |                    |  |
| VIT_217s0000g09890 | <i>VvSPY2</i>   | 2074 | UDP-N-acetylglucosamine--peptide<br>N-acetylglucosaminyltransferase | 265.3279947 | 8.268614575 | 2.92150476  | 2.448646076 | -1.364741744       | -0.595017111           | -5.00398746915432  | -6.75964882794507  |  |
|                    |                 |      | SPINDLY-like                                                        |             |             |             |             |                    |                        |                    |                    |  |
| VIT_217s0000g00430 | <i>VvHLH137</i> | 1564 | transcription factor bHLH137-like                                   | 189.2193412 | 29.75695085 | 361.1782431 | 400.6015399 | -0.974376994       | -0.290706673           | -2.66876095374283  | 1.08210840464936   |  |
| VIT_207s0129g01000 | <i>VvGID2-1</i> | 777  | F-box protein GID2-like                                             | 495.7680829 | 34.84151885 | 21.62227993 | 2.552162413 | -0.688288863       | -3.082726608           | -3.83078597283254  | -7.60180144333774  |  |
| VIT_218s0001g09700 | <i>VvGID2-2</i> | 924  | F-box protein GID2-like                                             | 745.2353334 | 81.06710334 | 140.8388632 | 161.5883806 | 0.796856989        | 0.198277974            | -3.20050757839836  | -2.20537261593714  |  |
| VIT_207s0104g00930 | <i>VvGID1B</i>  | 1699 | gibberellin receptor GID1B-like                                     | 1056.012332 | 163.7519686 | 92.77871026 | 98.04269357 | -0.819646554       | 0.07961633             | -2.68904252620159  | -3.42907275112994  |  |
| VIT_214s0068g01610 | <i>VvGAI1-1</i> | 2007 | DELLA protein GAI1-like                                             | 1.38778E-17 | 0.01343498  | 0.011435734 | 0.012049474 | -0.232445147285861 | 0.075421226113346<br>6 | 49.7821379450127   | 49.6251140238401   |  |
| VIT_217s0000g10300 | <i>VvGAI1-2</i> | 1575 | DELLA protein GAI1-like                                             | 0.023       | 0.017120003 | 0.014572393 | 0.015354473 | -0.232445147285869 | 0.075421226113353      | -0.425950938294278 | -0.582974859466794 |  |
| VIT_207s0005g01500 | <i>VvGAI1-3</i> | 1815 | DELLA protein GAI1-like                                             | 0.023       | 0.356548815 | 0.227618365 | 0.01332413  | -0.647482646564714 | -4.09450377532896      | 3.95439384281841   | -0.787592579075264 |  |
| VIT_214s0006g00640 | <i>VvGAI1-4</i> | 2251 | DELLA protein GAI1-like                                             | 2614.12558  | 139.455769  | 155.5523614 | 178.8983693 | 0.157592678778968  | 0.201739940940811      | -4.22844892584374  | -3.86911630612396  |  |
| VIT_201s0011g05260 | <i>VvGAI1-5</i> | 2379 | GAI1                                                                | 640.585936  | 6.596490292 | 3.357346961 | 2.744636262 | -0.974376994345422 | -0.29070667268454<br>7 | -6.60154968113818  | -7.86663334816815  |  |
| VIT_219s0085g00540 | <i>VvRGL1</i>   | 1593 | DELLA protein RGL1-like                                             | 4.233074983 | 0.101559338 | 0.014407733 | 0.015180976 | -2.81740764800702  | 0.075421226113348<br>4 | -5.38131124872597  | -8.12329767061965  |  |
| VIT_211s0016g04630 | <i>VvSLR1</i>   | 1697 | DELLA protein SLR1-like                                             | 1511.607182 | 217.9683021 | 84.63795078 | 56.03342144 | -1.3647417443757   | -0.59501711078699<br>3 | -2.79389302622774  | -4.75365188139044  |  |

miRNA

| miRNA      | Stone hardening | Veraison | Ripe | Target gene | Stone hardening | Veraison   | Ripe        | Gene                   |
|------------|-----------------|----------|------|-------------|-----------------|------------|-------------|------------------------|
| VvmiR3633a | 7821            | 3629     | 1689 | VvGA3ox1-3  | 0.022658827     | 0.01928699 | 0.020322097 | VIT_209s0002g0530<br>0 |

|                   |      |      |     |          |             |             |             |                        |
|-------------------|------|------|-----|----------|-------------|-------------|-------------|------------------------|
| VvmiR396c/d       | 59   | 85   | 90  | VvGID1B  | 163.7519686 | 92.77871026 | 98.04269357 | VIT_207s0104g0093<br>0 |
| VvmiR159c         | 1360 | 1204 | 787 | VvGAMYB1 | 3.408010061 | 1.550778274 | 1.614782818 | VIT_213s0067g0163<br>0 |
| VvmiR477          | 134  | 246  | 821 | VvGAI1-2 | 0.017120003 | 0.014572393 | 0.015354473 | VIT_217s0000g1030<br>0 |
| VvmiR319b/c/f/g/e | 20   | 2    | 2   | VvGAMYB1 | 3.408010061 | 1.550778274 | 1.614782818 | VIT_213s0067g0163<br>0 |
| VvmiR319b/c/f/g/e | 27   | 87   | 194 | VvGAMYB2 | 2.12139163  | 1.164207458 | 0.275379136 | VIT_206s0009g0248<br>0 |

---
