# Supplementary material for: Genome-wide identification and characterization of gibberellin metabolic and signal transduction (GA MST) pathway mediating seed and berry development (SBD) in grape (Vitis vinifera L.)
Source: PubMed Central journal article supplement (PMC7441673; doi:10.1186/s12870-020-02591-1), 2020-08-21
Supplement: 12870_2020_2591_MOESM2_ESM.pdf [file 12870_2020_2591_MOESM2_ESM.pdf]

Additional file 2:Table S2 The gene expression patterns of auxin, ABA, and CK MST pathway genes in three stages of grapevine SBD.

| <b>Auxin</b>       |                  |                                                |                |                         |               |             |                                  |                       |                               |                         |
|--------------------|------------------|------------------------------------------------|----------------|-------------------------|---------------|-------------|----------------------------------|-----------------------|-------------------------------|-------------------------|
| #Gene              | Abbreviation     | Function                                       | Green<br>-RPKM | Stone<br>hardening-RPKM | Veraison-RPKM | Ripe-RPKM   | Veraison/Stone<br>hardening Log2 | Ripe/veraison<br>log2 | Stone hardening/Green<br>log2 | Ripe/Green log2         |
| VIT_211s0016g03930 | <i>VvYUC 2</i>   | flavin-containing monooxygenase<br>YUCCA2-like | 1.061963108    | 0.04249646              | 0.018086303   | 0.01905697  | -1.232445147                     | 0.075421226           | -4.6432471562059              | -5.80027107737842       |
| VIT_204s0008g04870 | <i>VvYUC 4</i>   | flavin-containing monooxygenase<br>YUCCA4-like | 0.023          | 0.096128357             | 0.020455899   | 0.021553739 | -2.232445147                     | 0.075421226           | 2.06332821437157              | -0.093695706800947<br>4 |
| VIT_204s0023g01480 | <i>VvYUC 6-1</i> | flavin-containing monooxygenase<br>YUCCA6-like | 11.6324849     | 0.236181058             | 0.904658392   | 4.201185565 | 1.937479854                      | 2.215351487           | -5.62212224011898             | -1.46929089870471       |
| VIT_204s0008g03920 | <i>VvYUC 6-2</i> | flavin-containing monooxygenase                | 57.08625846    | 1.555615623             | 0.073562559   | 0.01937764  | -4.402370149                     | -1.924578774          | -5.19758597440072             | -11.5245348970156       |

|                    |                   |                                                       |             |             |             |             |              |              |                    |                    |  |  |
|--------------------|-------------------|-------------------------------------------------------|-------------|-------------|-------------|-------------|--------------|--------------|--------------------|--------------------|--|--|
|                    |                   | YUCCA6-like                                           |             |             |             |             |              |              |                    |                    |  |  |
| VIT_207s0005g04800 | <i>VvYUC 8</i>    | flavin-containing monooxygenase<br>YUCCA8-like        | 0.023       | 0.017751155 | 0.015109624 | 0.015920537 | -0.232445147 | 0.075421226  | -0.373720979521722 | -0.530744900694235 |  |  |
| VIT_218s0001g15190 | <i>VvYUC 10-1</i> | flavin-containing monooxygenase<br>YUCCA10-like       | 0.023       | 0.023652635 | 0.020132911 | 0.021213417 | -0.232445147 | 0.075421226  | 0.0403670659282599 | -0.116656855244262 |  |  |
| VIT_207s0104g01260 | <i>VvYUC 10-2</i> | flavin-containing monooxygenase<br>YUCCA10-like       | 19.03193096 | 2.109653135 | 5.087867171 | 12.8110365  | 1.270055193  | 1.332254293  | -3.17334422459401  | -0.571034738571872 |  |  |
| VIT_218s0001g15100 | <i>VvYUC 10-3</i> | flavin-containing monooxygenase<br>YUCCA10-like       | 0.023       | 0.236526352 | 0.120797466 | 0.021213417 | -0.969410741 | -2.509541275 | 3.36229516081562   | -0.116656855244262 |  |  |
| VIT_207s0104g01250 | <i>VvYUC 10-4</i> | flavin-containing monooxygenase<br>YUCCA10-like       | 399.5752022 | 32.42172957 | 59.33891452 | 80.28344455 | 0.872017481  | 0.436123981  | -3.62343409148949  | -2.31529262999861  |  |  |
| VIT_200s0394g00040 | <i>VvTAR 1-1</i>  | tryptophan aminotransferase 1-like                    | 22.20312408 | 1.30670354  | 4.479078257 | 0.696833649 | 1.777270008  | -2.684315676 | -4.08675891440054  | -4.99380458256471  |  |  |
| VIT_200s0225g00230 | <i>VvTAR 1-2</i>  | tryptophan aminotransferase 1-like                    | 0.023       | 0.016613681 | 62.90101915 | 19.63868323 | 11.88649593  | -1.679385192 | -0.469262109567611 | 9.73784862426792   |  |  |
| VIT_217s0000g08990 | <i>VvTAR 2</i>    | tryptophan aminotransferase-related<br>protein 2-like | 107.8253633 | 6.477222732 | 0.598735264 | 0.89373047  | -3.435385206 | 0.577921567  | -4.0571774117676   | -6.91464105108121  |  |  |
| VIT_218s0157g00090 | <i>VvTAR 4-1</i>  | tryptophan aminotransferase-related<br>protein 4-like | 392.1757499 | 6.745195807 | 1.628172435 | 0.12038977  | -2.050606824 | -3.757468788 | -5.86149619529246  | -11.6695718076439  |  |  |
| VIT_218s0157g00170 | <i>VvTAR 4-2</i>  | tryptophan aminotransferase-related<br>protein 4-like | 35.9449642  | 6.711783072 | 2.671755708 | 1.826849534 | -1.328907987 | -0.548430288 | -2.42102167391412  | -4.29835994870268  |  |  |
| VIT_218s0157g00140 | <i>VvTAR 4-3</i>  | tryptophan aminotransferase-related<br>protein 4-like | 0.023       | 0.66577788  | 0.366690927 | 2.002102859 | -0.86047637  | 2.448879622  | 4.85533517209574   | 6.44373842383762   |  |  |
| VIT_218s0157g00130 | <i>VvTAR 4-4</i>  | tryptophan aminotransferase-related<br>protein 4-like | 6.347181498 | 0.019082805 | 0.016243113 | 0.017114858 | -0.232445147 | 0.075421226  | -8.37769900120738  | -8.5347229223799   |  |  |
| VIT_218s0001g08090 | <i>VvAux</i>      | Aux/IAA protein                                       | 3416.437625 | 397.5722273 | 314.6251718 | 104.9379417 | -0.337582881 | -1.584097701 | -3.10320390255464  | -5.02488448421951  |  |  |
| VIT_208s0007g02030 | <i>VvAux 1</i>    | AUX-1-like protein                                    | 935.506965  | 9.182941878 | 1.101503424 | 1.450774508 | -3.059482435 | 0.397349321  | -6.67064817000177  | -9.33278128420623  |  |  |

|                    |                   |                                     |             |             |             |             |              |              |                   |                   |
|--------------------|-------------------|-------------------------------------|-------------|-------------|-------------|-------------|--------------|--------------|-------------------|-------------------|
| VIT_207s0005g02550 | <i>VvLAA 4</i>    | auxin-responsive protein IAA4-like  | 15.86073864 | 0.383147483 | 0.081532925 | 0.042954343 | -2.232445147 | -0.924578774 | -5.37141631993051 | -8.52844024110303 |
| VIT_204s0008g00220 | <i>VvLAA 6</i>    | auxin-responsive protein IAA6-like  | 56.02919375 | 0.204660373 | 0.014517089 | 0.015296202 | -3.817407648 | 0.075421226  | -8.09680313272345 | -11.8387895546171 |
| VIT_211s0016g04490 | <i>VvLAA 7</i>    | auxin-responsive protein IAA7-like  | 936.5640296 | 41.02130499 | 69.77715814 | 24.64692038 | 0.766381453  | -1.501347447 | -4.51293233648606 | -5.24789833070196 |
| VIT_207s0005g04380 | <i>VvLAA 11</i>   | auxin-responsive protein IAA11-like | 322.4094846 | 10.64426699 | 1.842136616 | 0.594184154 | -2.530624639 | -1.632398022 | -4.92074567773661 | -9.08376833953058 |
| VIT_205s0049g01970 | <i>VvLAA 13</i>   | auxin-responsive protein IAA13-like | 359.4067465 | 7.684990691 | 1.840652313 | 1.551550084 | -2.061826376 | -0.246506869 | -5.54743016775209 | -7.85576341219958 |
| VIT_205s0020g04690 | <i>VvLAA 14</i>   | auxin-responsive protein IAA14-like | 141.6514323 | 6.389574439 | 0.435099876 | 0.022922555 | -3.876301337 | -4.246506869 | -4.47048153147747 | -12.5932897373121 |
| VIT_209s0002g05160 | <i>VvLAA 17</i>   | auxin-responsive protein IAA17-like | 1364.6752   | 90.87202915 | 218.5089378 | 30.28089086 | 1.265784093  | -2.851212737 | -3.90857751877946 | -5.49400616296865 |
| VIT_211s0016g03540 | <i>VvLAA 27-1</i> | auxin-responsive protein IAA27-like | 2043.310686 | 301.5706236 | 208.8849516 | 156.049474  | -0.529787338 | -0.420705068 | -2.76034077713692 | -3.71083318377522 |
| VIT_209s0002g04080 | <i>VvLAA 27-2</i> | auxin-responsive protein IAA27-like | 1482.009373 | 31.95733823 | 1.438556712 | 0.723431904 | -4.473453247 | -0.99169297  | -5.53526351258457 | -11.0004097291194 |
| VIT_211s0016g05640 | <i>VvLAA 29</i>   | auxin-responsive protein IAA29-like | 20.08899527 | 1.198400184 | 0.35702362  | 0.026870328 | -1.74701832  | -3.731933696 | -4.06722375549757 | -9.54617577155745 |
| VIT_205s0020g01070 | <i>VvLAA 31</i>   | auxin-responsive protein IAA31-like | 53.91506433 | 1.008725334 | 0.396285211 | 0.034796108 | -1.347922365 | -3.509541275 | -5.74008312854117 | -10.5975467678548 |
| VIT_211s0052g00870 | <i>VvLAA 33</i>   | auxin-responsive protein IAA33-like | 10.57542238 | 1.308597902 | 0.058624568 | 0.617708686 | -4.480372661 | 3.397349321  | -3.01462151751749 | -4.09764485724623 |
| VIT_212s0035g01800 | <i>VvARF 1-1</i>  | auxin response factor 1-like        | 1392.15888  | 30.41742579 | 10.51252618 | 20.45605783 | -1.532788671 | 0.960418751  | -5.51628199450604 | -6.08865191384468 |
| VIT_218s0089g00910 | <i>VvARF 1-2</i>  | auxin response factor 1-like        | 1264.254062 | 22.93344255 | 2.528753125 | 8.789494543 | -3.180954832 | 1.797354005  | -5.78468966842028 | -7.16829049519433 |
| VIT_217s0000g00320 | <i>VvARF 2-1</i>  | auxin response factor 2-like        | 2303.348582 | 35.09397514 | 16.3579752  | 24.63498424 | -1.101229191 | 0.590714367  | -6.03636557772297 | -6.54688040217974 |
| VIT_201s0244g00150 | <i>VvARF 2-2</i>  | auxin response factor 2-like        | 4829.733021 | 87.08666783 | 101.7922921 | 189.3105474 | 0.225104544  | 0.895126471  | -5.79334775898053 | -4.67311674338431 |
| VIT_210s0003g00420 | <i>VvARF 3</i>    | auxin response factor 3-like        | 1531.69141  | 8.708219234 | 3.536498563 | 1.43029605  | -1.300056053 | -1.306007881 | -7.45853222296702 | -10.0645961569302 |
| VIT_206s0004g03130 | <i>VvARF 4</i>    | auxin response factor 4-like        | 905.9091556 | 11.66591287 | 1.949432224 | 0.401182732 | -2.581173302 | -2.280722584 | -6.2789952751497  | -11.1408911607786 |
| VIT_218s0001g13930 | <i>VvARF 5-1</i>  | auxin response factor 5-like        | 1126.835661 | 5.297633753 | 4.576802797 | 11.49417789 | -0.211007977 | 1.328491246  | -7.7327133035124  | -6.61523003440718 |
| VIT_211s0065g00310 | <i>VvARF 5-2</i>  | auxin response factor 5-like        | 1814.984728 | 6.648092903 | 1.394196374 | 4.295960531 | -2.253506763 | 1.623546959  | -8.09280115063364 | -8.7227609547932  |
| VIT_200s1203g00010 | <i>VvARF 6-1</i>  | auxin response factor 6-like        | 69.77103488 | 6.973449345 | 2.110484455 | 0.972891181 | -1.724298244 | -1.117223852 | -3.32268388070125 | -6.16420597614584 |
| VIT_212s0028g01170 | <i>VvARF 6-2</i>  | auxin response factor 6-like        | 1056.012332 | 10.34235775 | 1.056933814 | 3.961239237 | -3.290608173 | 1.906066798  | -6.67391775699245 | -8.05845913167929 |
| VIT_210s0003g04100 | <i>VvARF 6-3</i>  | auxin response factor 6-like        | 2811.796664 | 20.61122829 | 2.373259107 | 1.804251071 | -3.118488958 | -0.395469508 | -7.09191797642239 | -10.6058764423102 |
| VIT_204s0079g00200 | <i>VvARF 8</i>    | auxin response factor 8-like        | 1438.669724 | 5.882657836 | 0.94933288  | 3.157753856 | -2.631482168 | 1.733912762  | -7.93405158985828 | -8.83162099547281 |
| VIT_202s0025g01740 | <i>VvARF 9</i>    | auxin response factor 9-like        | 1516.892506 | 14.17592864 | 1.670735534 | 1.369201264 | -3.084887959 | -0.287148853 | -6.7415317954982  | -10.1135686076416 |

|                    |                   |                                                      |             |             |             |             |              |              |                    |                    |
|--------------------|-------------------|------------------------------------------------------|-------------|-------------|-------------|-------------|--------------|--------------|--------------------|--------------------|
| VIT_218s0001g04180 | <i>VvARF 17</i>   | auxin response factor 17-like                        | 247.357896  | 5.790076123 | 4.496770857 | 3.904199673 | -0.364692946 | -0.203862531 | -5.41687382737534  | -5.98542930432517  |
| VIT_215s0046g00290 | <i>VvARF 18-1</i> | auxin response factor 18-like                        | 1639.512001 | 7.609473559 | 0.337936468 | 0.217600201 | -4.492972698 | -0.635072157 | -7.75125409884861  | -12.8792989530494  |
| VIT_213s0019g04380 | <i>VvARF 18-2</i> | auxin response factor 18-like                        | 483.0833074 | 11.63601365 | 3.61931533  | 6.437943746 | -1.684808182 | 0.830883164  | -5.37560320296062  | -6.22952822131721  |
| VIT_206s0004g02750 | <i>VvARF 18-3</i> | auxin response factor 18-like                        | 580.3332526 | 7.819087315 | 1.774809863 | 2.50758244  | -2.139335743 | 0.498632657  | -6.21373756792749  | -7.85444065398399  |
| VIT_211s0016g00640 | <i>VvARF 19</i>   | auxin response factor 19-like                        | 316.0670969 | 5.204449327 | 2.109514564 | 3.578594214 | -1.302834475 | 0.762481914  | -5.92434152295418  | -6.46469408367821  |
| VIT_207s0104g01230 | <i>VvARF 23</i>   | auxin response factor 23-like                        | 9.518360476 | 1.23794567  | 0.021952672 | 0.023130842 | -5.817407648 | 0.075421226  | -2.94276509219461  | -8.68475151408828  |
| VIT_207s0005g00660 | <i>VvSAUR 2</i>   | indole-3-acetic acid-induced protein<br>ARG2-like    | 2514.761506 | 529.4212146 | 2239.514343 | 3605.38887  | 2.080697994  | 0.686968968  | -2.24793367277823  | 0.519733289663084  |
| VIT_208s0040g01670 | <i>VvSAUR 7-1</i> | indole-3-acetic acid-induced protein<br>ARG7-like    | 0.023       | 0.279419732 | 0.059459892 | 0.062651023 | -2.232445147 | 0.075421226  | 3.60272813771229   | 1.44570421653977   |
| VIT_216s0098g01150 | <i>VvSAUR 7-2</i> | indole-3-acetic acid-induced protein<br>ARG7-like    | 80.34168178 | 8.407027905 | 90.2934262  | 216.2703802 | 3.42495319   | 1.260143229  | -3.25648089460196  | 1.4286155244438    |
| VIT_208s0007g03120 | <i>VvSAUR 7-3</i> | indole-3-acetic acid-induced protein<br>ARG7-like    | 7.404239581 | 0.864577287 | 0.045995027 | 0.048463517 | -4.232445147 | 0.075421226  | -3.09828473667403  | -7.25530865784655  |
| VIT_203s0038g01080 | <i>VvSAUR 7-4</i> | indole-3-acetic acid-induced protein<br>ARG7-like    | 0.023       | 0.094610541 | 1.610632874 | 0.169707334 | 4.089482948  | -3.246506869 | 2.04036706592826   | 2.88334314475574   |
| VIT_218s0001g13980 | <i>VvSAUR 7-5</i> | indole-3-acetic acid-induced protein<br>ARG7-like    | 17.97486674 | 0.361125055 | 0.409848544 | 0.755727971 | 0.182592352  | 0.882776148  | -5.6373387444852   | -4.57197024432127  |
| VIT_219s0014g04690 | <i>VvGH3 6-1</i>  | indole-3-acetic acid-amido synthetase<br>GH3.6-like  | 521.1376338 | 4.057440622 | 0.765050615 | 1.128553769 | -2.406942879 | 0.560848053  | -7.00495065012989  | -8.85104547536431  |
| VIT_212s0134g00230 | <i>VvGH3 6-2</i>  | indole-3-acetic acid-amido synthetase<br>GH3.6-like  | 0.023       | 0.014567263 | 0.012399524 | 0.013064989 | -0.232445147 | 0.075421226  | -0.658904004890212 | -0.815927926062734 |
| VIT_201s0150g00300 | <i>VvGH3 17</i>   | indole-3-acetic acid-amido synthetase<br>GH3.17-like | 23.26018857 | 0.668027129 | 0.180924132 | 0.217867523 | -1.884521844 | 0.268066304  | -5.12181228886016  | -6.73826782866997  |
| VIT_214s0030g01240 | <i>VvTIR 1-1</i>  | protein TRANSPORT INHIBITOR                          | 630.0152898 | 17.34064404 | 12.93990782 | 19.95121842 | -0.422330142 | 0.624649515  | -5.18315745483917  | -4.9808380817809   |

|                    |                  | RESPONSE 1-like                             |             |             |             |             |              |              |                   |                   |
|--------------------|------------------|---------------------------------------------|-------------|-------------|-------------|-------------|--------------|--------------|-------------------|-------------------|
| VIT_200s0181g00040 | <i>VvTIR 1-2</i> | protein TRANSPORT INHIBITOR                 | 364.6920696 | 2.123877038 | 1.048014541 | 6.101036767 | -1.019041509 | 2.541395691  | -7.42383477426448 | -5.90148059282373 |
|                    |                  | RESPONSE 1-like                             |             |             |             |             |              |              |                   |                   |
| VIT_207s0104g01320 | <i>VvTIR 1-3</i> | transport inhibitor response 1              | 1525.349022 | 22.46403532 | 5.425458545 | 4.19648148  | -2.049800128 | -0.370564861 | -6.0853784714289  | -8.50574346121475 |
| VIT_218s0001g07120 | <i>VvTIR 1-4</i> | transport inhibitor response 1-like protein | 871.0260232 | 11.20856642 | 5.040333464 | 8.318511578 | -1.15301068  | 0.722806227  | -6.28004214779304 | -6.71024660021618 |

### ABA

| #Gene              | Abbreviation      | Function                                                       | Green-RKPM  | Stone hardening-RKPM | Veraison-RPKM | Ripe-RPKM   | Veraison/Stone hardening Log2 | Ripe/veraision log2 | Stone hardening/Green log2 | Ripe/Green log2    |
|--------------------|-------------------|----------------------------------------------------------------|-------------|----------------------|---------------|-------------|-------------------------------|---------------------|----------------------------|--------------------|
| VIT_219s0093g00550 | <i>VvNCED 1</i>   | 9-cis-epoxycarotenoid dioxygenase<br>NCED1, chloroplastic-like | 5051.71659  | 17.54651529          | 4.107743528   | 8.194166006 | -2.094766529                  | 0.996251013         | -8.16944535179854          | -9.26796086768021  |
| VIT_210s0003g03750 | <i>VvNCED 2-1</i> | 9-cis-epoxycarotenoid dioxygenase 2                            | 1789.615177 | 4.413785613          | 0.599517243   | 53.56752515 | -2.880143403                  | 6.481413586         | -8.66341712462968          | -5.06214694219548  |
| VIT_205s0051g00670 | <i>VvNCED 6</i>   | 9-cis-epoxycarotenoid dioxygenase<br>NCED6, chloroplastic-like | 41.23028775 | 2.788323155          | 0.391219065   | 1.923671198 | -2.833349192                  | 2.297813647         | -3.8862348516903           | -4.42177039611655  |
| VIT_213s0019g01010 | <i>VvABA 2</i>    | xanthoxin dehydrogenase-like                                   | 424.9447532 | 54.63237409          | 133.1750148   | 69.8058215  | 1.285495419                   | 0.353591238         | -2.9594472666624           | -2.60585602857384  |
| VIT_208s0058g00470 | <i>VvPYL 4-1</i>  | abscisic acid receptor PYL4-like                               | 33.83083481 | 11.70723505          | 18.44602407   | 32.95183392 | 0.655909497                   | 0.837048875         | -1.53093838920384          | -0.037980017804785 |
| VIT_213s0067g01940 | <i>VvPYL 4-2</i>  | abscisic acid receptor PYL4-like                               | 3.176031061 | 1.66489153           | 0.308074073   | 0.194764792 | -2.434079008                  | -0.661544368        | -0.931796834578973         | -4.02742021108735  |
| VIT_216s0050g02620 | <i>VvPYL 8</i>    | abscisic acid receptor PYL8-like                               | 257.9285423 | 39.64518847          | 85.58302059   | 53.60545907 | 1.110178815                   | -0.674944669        | -2.70175374117764          | -2.26651959593848  |
| VIT_215s0046g01050 | <i>VvPYL 9</i>    | abscisic acid receptor PYL9-like                               | 1893.20751  | 79.21871427          | 75.73187205   | 15.90780579 | -0.064940694                  | -2.251165737        | -4.57884745345635          | -6.89495388522952  |
| VIT_202s0012g01270 | <i>VvPYR 1</i>    | abscisic acid receptor PYR1-like                               | 100.4259106 | 40.00084575          | 87.52972957   | 24.63958365 | 1.129742609                   | -1.828795235        | -1.32802913432879          | -2.02708176021713  |
| VIT_218s0001g03620 | <i>VvPP2C 2</i>   | probable protein phosphatase 2C 2-like                         | 70.82809958 | 0.447029458          | 0.415099053   | 0.546721064 | -0.106914265                  | 0.397349321         | -7.30780811842491          | -7.0173730626262   |
| VIT_208s0007g00310 | <i>VvPP2C 4</i>   | probable protein phosphatase 2C 4-like                         | 249.4720253 | 1.752706393          | 0.659571519   | 0.910079527 | -1.409983333                  | 0.464463517         | -7.15314989593285          | -8.09866971191166  |
| VIT_214s0060g01580 | <i>VvPP2C 5</i>   | probable protein phosphatase 2C 5-like                         | 1369.960523 | 63.99029212          | 51.33990282   | 64.68933335 | -0.317772487                  | 0.33344728          | -4.42013745866335          | -4.40446266584912  |

|                    |                    |                                            |             |             |             |             |              |              |                   |                   |
|--------------------|--------------------|--------------------------------------------|-------------|-------------|-------------|-------------|--------------|--------------|-------------------|-------------------|
| VIT_219s0015g01920 | <i>VvPP2C 6-1</i>  | probable protein phosphatase 2C 6-like     | 218.817151  | 4.945858562 | 1.853887902 | 0.345911667 | -1.415666971 | -2.422078433 | -5.46736102807361 | -9.30510643277271 |
| VIT_211s0016g03180 | <i>VvPP2C 6-2</i>  | probable protein phosphatase 2C 6-like     | 1163.832923 | 4.510166159 | 6.253875981 | 10.52582267 | 0.471570025  | 0.75111048   | -8.01148766295904 | -6.78880715796499 |
| VIT_209s0002g03530 | <i>VvPP2C 6-3</i>  | probable protein phosphatase 2C 6-like     | 50.74387019 | 3.180740434 | 10.4194561  | 0.778014854 | 1.71184542   | -3.743338459 | -3.99579900672635 | -6.02729204581501 |
| VIT_202s0025g01390 | <i>VvPP2C 8-1</i>  | probable protein phosphatase 2C 8-like     | 32.77377013 | 2.930870014 | 2.525914395 | 2.13575296  | -0.214523239 | -0.242060964 | -3.48314075233704 | -3.93972495536847 |
| VIT_217s0000g03100 | <i>VvPP2C 8-2</i>  | probable protein phosphatase 2C 8-like     | 130.0237211 | 2.349804282 | 1.900125711 | 2.318224363 | -0.306445729 | 0.286925331  | -5.79009043978114 | -5.80961083720373 |
| VIT_218s0001g05690 | <i>VvPP2C 10</i>   | probable protein phosphatase 2C<br>10-like | 81.39874646 | 9.299504384 | 66.46821827 | 88.80155008 | 2.837438947  | 0.417920178  | -3.12978084212565 | 0.125578282534701 |
| VIT_218s0001g15050 | <i>VvPP2C 11</i>   | probable protein phosphatase 2C<br>11-like | 343.5507771 | 79.82907097 | 45.71839074 | 61.36292246 | -0.804139599 | 0.424592572  | -2.10553722000054 | -2.48508424732692 |
| VIT_218s0001g10700 | <i>VvPP2C 12</i>   | probable protein phosphatase 2C<br>12-like | 547.5642493 | 21.33029643 | 19.33096715 | 14.44920933 | -0.141990196 | -0.419923269 | -4.68205233543223 | -5.24396580050751 |
| VIT_201s0137g00750 | <i>VvPP2C 14</i>   | probable protein phosphatase 2C<br>14-like | 67.65690549 | 0.082838722 | 0.017627894 | 0.018573959 | -2.232445147 | 0.075421226  | -9.67371617395838 | -11.8307400951309 |
| VIT_201s0011g03910 | <i>VvPP2C 15</i>   | probable protein phosphatase 2C<br>15-like | 380.548039  | 9.953654418 | 18.53825127 | 42.21084229 | 0.897206956  | 1.187108458  | -5.25670847670432 | -3.17239306314236 |
| VIT_204s0008g04780 | <i>VvPP2C 22</i>   | probable protein phosphatase 2C<br>22-like | 248.4149607 | 17.01000261 | 3.941440669 | 6.667357049 | -2.1095884   | 0.758391931  | -3.86829679445543 | -5.21949326331694 |
| VIT_206s0004g05460 | <i>VvPP2C 24</i>   | probable protein phosphatase 2C<br>24-like | 1810.75647  | 22.77575702 | 52.14914976 | 138.332173  | 1.195144724  | 1.407421098  | -6.31294971247772 | -3.71038389004545 |
| VIT_213s0067g01270 | <i>VvPP2C 25-1</i> | probable protein phosphatase 2C<br>25-like | 122.6242685 | 6.148144265 | 1.794255514 | 1.071312094 | -1.776765664 | -0.744006528 | -4.31794970234393 | -6.83872189409844 |
| VIT_206s0004g06840 | <i>VvPP2C 25-1</i> | probable protein phosphatase 2C<br>25-like | 3308.617034 | 36.91087969 | 21.00447447 | 22.47367909 | -0.813349431 | 0.097539632  | -6.48603838045855 | -7.20184817979315 |
| VIT_206s0004g07360 | <i>VvPP2C 26</i>   | probable protein phosphatase 2C<br>26-like | 112.0536219 | 4.301290539 | 4.724154741 | 4.023635713 | 0.135286637  | -0.231556527 | -4.70327588766999 | -4.79954577776342 |



|                    |                    |                                            |             |             |             |             |              |              |                   |                   |
|--------------------|--------------------|--------------------------------------------|-------------|-------------|-------------|-------------|--------------|--------------|-------------------|-------------------|
| VIT_218s0122g01010 | <i>VvPP2C 27-1</i> | probable protein phosphatase 2C<br>27-like | 693.439167  | 18.49189002 | 9.062499616 | 13.64124511 | -1.028911753 | 0.589994399  | -5.22880473317629 | -5.66772208743391 |
| VIT_211s0118g00700 | <i>VvPP2C 27-2</i> | probable protein phosphatase 2C<br>27-like | 72.94222896 | 3.453517771 | 2.778086681 | 12.5256194  | -0.313975033 | 2.172718427  | -4.40061573368413 | -2.54187233899834 |
| VIT_204s0023g00690 | <i>VvPP2C 33</i>   | probable protein phosphatase 2C<br>33-like | 782.2325951 | 23.40872253 | 12.55086505 | 25.20701539 | -0.899259402 | 1.006038504  | -5.06247954287556 | -4.95570044069963 |
| VIT_205s0020g02360 | <i>VvPP2C 35</i>   | probable protein phosphatase 2C<br>35-like | 235.7301851 | 5.761981689 | 3.964753667 | 4.61076259  | -0.539333843 | 0.21777415   | -5.35442762042995 | -5.67598731361436 |
| VIT_208s0040g02970 | <i>VvPP2C 38-1</i> | probable protein phosphatase 2C<br>38-like | 75.05635835 | 1.725938501 | 0.257737433 | 0.027156985 | -2.743407067 | -3.246506869 | -5.44252132934131 | -11.4324352646786 |
| VIT_213s0067g03500 | <i>VvPP2C 38-2</i> | probable protein phosphatase 2C<br>38-like | 190.2764058 | 12.74172575 | 7.905098701 | 9.858414792 | -0.688705309 | 0.318572208  | -3.90046408379253 | -4.27059718546715 |
| VIT_219s0014g02340 | <i>VvPP2C 39-1</i> | probable protein phosphatase 2C<br>39-like | 591.9609634 | 127.9336405 | 78.20710374 | 43.91971861 | -0.710024113 | -0.832430846 | -2.21010636655518 | -3.75256132492122 |
| VIT_201s0150g00510 | <i>VvPP2C 39-2</i> | probable protein phosphatase 2C<br>39-like | 73.99929366 | 13.95494701 | 9.828896285 | 2.467908015 | -0.50567532  | -1.993740798 | -2.40673485329101 | -4.9061509719106  |
| VIT_205s0077g00830 | <i>VvPP2C 42</i>   | probable protein phosphatase 2C<br>42-like | 618.387579  | 16.19389903 | 6.727169201 | 7.609398877 | -1.267378937 | 0.177782944  | -5.25498904849608 | -6.34458504214831 |
| VIT_208s0007g06510 | <i>VvPP2C 43</i>   | probable protein phosphatase 2C<br>43-like | 330.8660016 | 4.828505594 | 3.070106028 | 2.191366543 | -0.653288268 | -0.486457661 | -6.09852649476866 | -7.23827242450934 |
| VIT_209s0070g00490 | <i>VvPP2C 44</i>   | probable protein phosphatase 2C<br>44-like | 372.091522  | 72.70472384 | 36.5997488  | 82.04725941 | -0.990215357 | 1.164621398  | -2.35553651100327 | -2.18113046952128 |
| VIT_207s0031g02160 | <i>VvPP2C 47</i>   | probable protein phosphatase 2C<br>47-like | 162.7927252 | 6.989480263 | 1.80118932  | 0.862662131 | -1.956235353 | -1.062082298 | -4.5417072392786  | -7.56002488961952 |
| VIT_207s0005g02110 | <i>VvPP2C 49</i>   | probable protein phosphatase 2C            | 3421.722949 | 59.10886496 | 44.21353024 | 46.73727267 | -0.418886586 | 0.080085618  | -5.85520462425402 | -6.19400559264535 |

|                    |                    |                                            |             |             |             |             |              |              |                   |                   |  |
|--------------------|--------------------|--------------------------------------------|-------------|-------------|-------------|-------------|--------------|--------------|-------------------|-------------------|--|
|                    |                    | 49-like                                    |             |             |             |             |              |              |                   |                   |  |
| VIT_212s0059g01820 | <i>VvPP2C 52</i>   | probable protein phosphatase 2C<br>52-like | 725.1511056 | 26.30924907 | 22.57152642 | 24.18329506 | -0.221066085 | 0.099506845  | -4.784639676595   | -4.90619891711271 |  |
| VIT_217s0000g07010 | <i>VvPP2C 55-1</i> | probable protein phosphatase 2C<br>55-like | 34.88789951 | 0.44385192  | 0.28335208  | 0.696638129 | -0.647482647 | 1.297813647  | -6.29650449198461 | -5.64617349109952 |  |
| VIT_208s0007g05820 | <i>VvPP2C 55-2</i> | probable protein phosphatase 2C<br>55-like | 0.023       | 0.03638867  | 0.030973709 | 0.032636026 | -0.232445147 | 0.075421226  | 0.661855442674529 | 0.504831521502011 |  |
| VIT_218s0001g12160 | <i>VvPP2C 55-3</i> | probable protein phosphatase 2C<br>55-like | 656.4419053 | 28.45235763 | 15.41362325 | 23.62710152 | -0.88434217  | 0.616236623  | -4.5280472315721  | -4.79615277795629 |  |
| VIT_218s0001g01220 | <i>VvPP2C 55-4</i> | probable protein phosphatase 2C<br>55-like | 0.023       | 0.034569236 | 0.029425024 | 0.031004224 | -0.232445147 | 0.075421226  | 0.587854861230754 | 0.430830940058233 |  |
| VIT_204s0023g01400 | <i>VvPP2C 55-5</i> | probable protein phosphatase 2C<br>55-like | 372.091522  | 27.37274943 | 14.20861729 | 17.35993993 | -0.945974186 | 0.28899579   | -3.76484526230312 | -4.4218236589903  |  |
| VIT_209s0018g01140 | <i>VvPP2C 58-1</i> | probable protein phosphatase 2C<br>58-like | 501.053406  | 37.37544464 | 18.69354444 | 23.81853948 | -0.999550602 | 0.349544811  | -3.74480173700025 | -4.39480752791537 |  |
| VIT_212s0028g03310 | <i>VvPP2C 58-2</i> | probable protein phosphatase 2C<br>58-like | 1147.976953 | 103.5767877 | 58.73436372 | 93.72389736 | -0.818423988 | 0.674212119  | -3.47032105242194 | -3.61453292127987 |  |
| VIT_204s0008g07320 | <i>VvPP2C 59</i>   | probable protein phosphatase 2C<br>59-like | 1290.680677 | 105.0338455 | 159.0678617 | 172.6945883 | 0.598788093  | 0.118580493  | -3.61920591952495 | -2.90183733351554 |  |
| VIT_203s0038g02650 | <i>VvPP2C 60-1</i> | probable protein phosphatase 2C<br>60-like | 1328.735003 | 57.56896953 | 39.37449209 | 46.22529117 | -0.548030075 | 0.231421093  | -4.5286182101014  | -4.8452271917941  |  |
| VIT_204s0008g06720 | <i>VvPP2C 60-2</i> | probable protein phosphatase 2C<br>60-like | 1511.607182 | 92.38583955 | 94.73605489 | 51.59576085 | 0.036241855  | -0.876661057 | -4.03226772922403 | -4.87268693107397 |  |
| VIT_218s0001g09390 | <i>VvPP2C 63-1</i> | probable protein phosphatase 2C<br>63-like | 702.9527486 | 25.58936863 | 6.060400951 | 2.939929988 | -2.078059403 | -1.043631446 | -4.7798112598082  | -7.90150210786844 |  |



|                    |                         |                                            |             |             |             |             |              |              |                    |                   |
|--------------------|-------------------------|--------------------------------------------|-------------|-------------|-------------|-------------|--------------|--------------|--------------------|-------------------|
| VIT_207s0129g00520 | <i>VvPP2C 63-2</i>      | probable protein phosphatase 2C<br>63-like | 562.363154  | 2.649749887 | 1.302439109 | 1.338867547 | -1.024640262 | 0.039797316  | -7.72950207361472  | -8.71434501940456 |
| VIT_203s0091g00470 | <i>VvPP2C 63-3</i>      | probable protein phosphatase 2C<br>63-like | 731.4934933 | 15.59491911 | 30.70235911 | 35.48997662 | 0.977273444  | 0.20906211   | -5.55169705679482  | -4.36536150254847 |
| VIT_204s0008g00740 | <i>VvPP2C 72</i>        | probable protein phosphatase 2C<br>72-like | 15.86073864 | 0.490626307 | 0.487219497 | 0.110007407 | -0.010052726 | -2.146971195 | -5.01469155638067  | -7.17171547755319 |
| VIT_208s0058g00660 | <i>VvPP2C 73-1</i>      | probable protein phosphatase 2C<br>73-like | 3.176031061 | 0.546000084 | 0.107250086 | 0.037668684 | -2.347922365 | -1.509541275 | -2.54025194426767  | -6.39771558358128 |
| VIT_214s0060g02070 | <i>VvPP2C 73-2</i>      | probable protein phosphatase 2C<br>73-like | 1020.072135 | 56.48923293 | 23.92044799 | 25.84230739 | -1.239731501 | 0.111490481  | -4.17455145549173  | -5.30279247603522 |
| VIT_205s0077g01820 | <i>VvPP2C 73-3</i>      | probable protein phosphatase 2C<br>73-like | 10.57542238 | 1.121084043 | 0.954256681 | 0.45072808  | -0.232445147 | -1.082120051 | -3.23774894525902  | -4.55231414341801 |
| VIT_216s0022g02210 | <i>VvPP2C 75</i>        | probable protein phosphatase 2C<br>75-like | 6.347181498 | 3.882816595 | 2.448161968 | 0.300947672 | -0.665404555 | -3.024114447 | -0.709012534093216 | -4.39853153609276 |
| VIT_216s0050g02570 | <i>VvPP2C 76</i>        | probable protein phosphatase 2C<br>76-like | 976.7324851 | 26.18310452 | 22.65175416 | 27.24568847 | -0.20901339  | 0.26640517   | -5.22125540755296  | -5.16386362811186 |
| VIT_206s0004g05050 | <i>VvCYP707A</i><br>2   | abscisic acid 8'-hydroxylase 2-like        | 0.023       | 0.061844046 | 0.013160274 | 0.665595277 | -2.232445147 | 5.660383727  | 1.42700085020344   | 4.85493942975208  |
| VIT_204s0023g02350 | <i>VvCYP707A</i><br>3-1 | abscisic acid 8'-hydroxylase 3-like        | 102.54004   | 0.206094299 | 0.014618802 | 0.015403373 | -3.817407648 | 0.075421226  | -8.95866705150954  | -12.7006534734032 |
| VIT_207s0031g00690 | <i>VvCYP707A</i><br>3-2 | abscisic acid 8'-hydroxylase 3-like        | 1.39E-17    | 1.162085027 | 0.216377952 | 0.016285047 | -2.425090225 | -3.731933696 | 56.2167156306872   | 50.0596917095146  |
| VIT_218s0076g00340 | <i>VvCYP707A</i><br>3-3 | abscisic acid 8'-hydroxylase 3-like        | 88.79819923 | 0.019109854 | 0.016266136 | 0.017139118 | -0.232445147 | 0.075421226  | -12.1819979409843  | -12.3390218621568 |
| VIT_203s0063g00380 | <i>VvCYP707A</i>        | abscisic acid 8'-hydroxylase 4-like        | 56.02919375 | 1.204186063 | 0.277024966 | 0.058378503 | -2.119970418 | -2.246506869 | -5.54004850267874  | -9.9065257894802  |

|                    |                         |                                                       |             |             |             |             |              |              |                    |                   |  |
|--------------------|-------------------------|-------------------------------------------------------|-------------|-------------|-------------|-------------|--------------|--------------|--------------------|-------------------|--|
|                    | 4-1                     |                                                       |             |             |             |             |              |              |                    |                   |  |
| VIT_218s0001g10500 | <i>VvCYP707A</i><br>4-2 | abscisic acid 8'-hydroxylase 4-like                   | 27.48844685 | 0.964914661 | 0.015209754 | 1.185926994 | -5.987332649 | 6.284874592  | -4.83228023084901  | -4.53473828855605 |  |
| VIT_218s0001g12870 | <i>VvCYP707A</i><br>4-3 | abscisic acid 8'-hydroxylase 4-like                   | 1.061963108 | 0.03573758  | 0.030419508 | 0.01602604  | -0.232445147 | -0.924578774 | -4.89314789289148  | -6.050171814064   |  |
| VIT_206s0009g01790 | <i>VvABIS 2-1</i>       | ABSCISIC ACID-INSENSITIVE<br>5-like protein 2         | 172.306307  | 9.157586309 | 4.2222133   | 7.376665474 | -1.11696793  | 0.804969349  | -4.23386430621917  | -4.54586288736803 |  |
| VIT_213s0175g00120 | <i>VvABIS 2-2</i>       | ABSCISIC ACID-INSENSITIVE<br>5-like protein 2-like    | 554.9637017 | 41.22665421 | 16.27079477 | 21.57195334 | -1.341292659 | 0.406872095  | -3.75074412511188  | -4.68516468920068 |  |
| VIT_212s0055g00420 | <i>VvABIS 5</i>         | ABSCISIC ACID-INSENSITIVE<br>5-like protein 5-like    | 325.5806785 | 17.75778117 | 11.91110669 | 14.82557087 | -0.576143865 | 0.315780194  | -4.19649185172585  | -4.45685552259106 |  |
| VIT_218s0001g04500 | <i>VvABIS 7</i>         | ABSCISIC ACID-INSENSITIVE<br>5-like protein 7         | 0.023       | 0.028807697 | 0.024520853 | 0.025836854 | -0.232445147 | 0.075421226  | 0.324820455396961  | 0.167796534224441 |  |
| VIT_201s0026g01690 | <i>VvWRI1-1</i>         | ethylene-responsive transcription<br>factor WRI1-like | 0.023       | 0.107640735 | 0.045811414 | 0.53097055  | -1.232445147 | 3.534852845  | 2.22651838178515   | 4.52892607924993  |  |
| VIT_213s0047g00340 | <i>VvWRI1-2</i>         | ethylene-responsive transcription<br>factor WRI1-like | 28.54551148 | 28.25189819 | 4.419776866 | 0.330022222 | -2.676302361 | -3.743338459 | -0.014916110011043 | -6.43455693012951 |  |

### CK

| #Gene              | Abbreviation     | Function                                                  | Green-RKPM  | Stone<br>hardening-RPKM | Veraison-RPKM | Ripe-RPKM   | Veraison/Stone<br>hardening Log2 | Ripe/veraision<br>log2 | Stone hardening/Green<br>log2 | Ripe/Green log2   |
|--------------------|------------------|-----------------------------------------------------------|-------------|-------------------------|---------------|-------------|----------------------------------|------------------------|-------------------------------|-------------------|
| VIT_207s0104g00270 | <i>VvIPT 3-1</i> | adenylate isopentenyltransferase 3,<br>chloroplastic-like | 32.77377013 | 6.759105781             | 1.315037763   | 2.381524133 | -2.361728164                     | 0.85678094             | -2.27763734470574             | -3.78258456929856 |
| VIT_209s0070g00710 | <i>VvIPT 3-2</i> | adenylate isopentenyltransferase 3,<br>chloroplastic-like | 21.14605964 | 0.867009779             | 0.098398793   | 0.02591993  | -3.139335743                     | -1.924578774           | -4.60819678044283             | -9.67211129722386 |
| VIT_205s0020g02630 | <i>VvIPT 5-1</i> | adenylate isopentenyltransferase 5,                       | 0.023       | 0.038301142             | 0.016300794   | 0.103053814 | -1.232445147                     | 2.660383727            | 0.735753556343064             | 2.16369213589171  |



|                    |                   |                                                                       |             |             |             |             |              |              |                   |                   |  |
|--------------------|-------------------|-----------------------------------------------------------------------|-------------|-------------|-------------|-------------|--------------|--------------|-------------------|-------------------|--|
|                    |                   | ARR9-like                                                             |             |             |             |             |              |              |                   |                   |  |
| VIT_213s0067g03490 | <i>VvARR 9-4</i>  | two-component response regulator<br>ARR9-like                         | 32.77377013 | 1.699858417 | 1.483076842 | 0.800392744 | -0.196821238 | -0.889813356 | -4.26905515012113 | -5.35568974340225 |  |
| VIT_218s0001g02540 | <i>VvARR 9-5</i>  | two-component response regulator<br>ARR9-like                         | 321.35242   | 2.490901075 | 2.862314079 | 1.117011319 | 0.20051426   | -1.357538181 | -7.01134480007788 | -8.1683687212504  |  |
| VIT_213s0067g03460 | <i>VvARR 9-6</i>  | two-component response regulator<br>ARR9-like                         | 0.023       | 0.054804886 | 0.046649428 | 0.049153039 | -0.232445147 | 0.075421226  | 1.25267066964112  | 1.09564674846861  |  |
| VIT_213s0067g03450 | <i>VvARR 9-7</i>  | two-component response regulator<br>ARR9-like                         | 0.023       | 0.052459152 | 0.04465276  | 0.047049212 | -0.232445147 | 0.075421226  | 1.18956062578648  | 1.03253670461397  |  |
| VIT_217s0000g10100 | <i>VvARR 11-1</i> | two-component response regulator<br>ARR11-like                        | 33.83083481 | 2.114271103 | 0.887826642 | 1.441137291 | -1.251810472 | 0.698857875  | -4.00010649400498 | -4.55305909150863 |  |
| VIT_201s0010g02230 | <i>VvARR 11-2</i> | two-component response regulator<br>ARR11-like                        | 48.62974076 | 1.264135215 | 0.667132744 | 1.088418343 | -0.922105027 | 0.706187416  | -5.26561620973785 | -5.48153381996393 |  |
| VIT_211s0206g00060 | <i>VvARR 12-1</i> | two-component response regulator<br>ARR12-like                        | 155.3932727 | 5.065898809 | 2.985263741 | 3.320227584 | -0.762959864 | 0.153423738  | -4.93896197759158 | -5.54849810346161 |  |
| VIT_204s0008g05900 | <i>VvARR 12-2</i> | two-component response regulator<br>ARR12-like                        | 727.2652349 | 6.928903501 | 6.937436326 | 12.21804106 | 0.001775561  | 0.816538464  | -6.71371073927321 | -5.89539671468    |  |
| VIT_213s0067g03070 | <i>VvARR 17</i>   | two-component response regulator<br>ARR17-like                        | 3.176031061 | 6.169142334 | 30.71019371 | 28.62829659 | 2.315575775  | -0.101275781 | 0.957844910693745 | 3.17214490464616  |  |
| VIT_204s0043g00690 | <i>VvARR 22-1</i> | two-component response regulator<br>ARR22-like                        | 0.023       | 42.70894272 | 5.208855251 | 0.05717091  | -3.035499932 | -6.509541275 | 10.8586886072055  | 1.3136474006879   |  |
| VIT_207s0005g05040 | <i>VvARR 22-2</i> | two-component response regulator<br>ARR22-like                        | 0.023       | 0.061561653 | 0.052400727 | 0.055213002 | -0.232445147 | 0.075421226  | 1.42039811537919  | 1.26337419420667  |  |
| VIT_208s0007g08340 | <i>VvLOG 1-1</i>  | cytokinin riboside 5'-monophosphate<br>phosphoribohydrolase LOG1-like | 0.023       | 0.040304939 | 0.034307202 | 0.036148423 | -0.232445147 | -0.157023921 | 0.809322774338901 | 0.652298853166383 |  |

|                    |                  |                                                                    |             |             |             |             |              |              |                   |                    |
|--------------------|------------------|--------------------------------------------------------------------|-------------|-------------|-------------|-------------|--------------|--------------|-------------------|--------------------|
| VIT_206s0004g02680 | <i>VvLOG 1-2</i> | cytokinin riboside 5'-monophosphate phosphoribohydrolase LOG1-like | 667.0125515 | 31.2149461  | 74.32171798 | 42.52252572 | 1.251546876  | 0.445990317  | -4.41740502998672 | -3.97141471292901  |
| VIT_208s0040g01780 | <i>VvLOG 3-1</i> | cytokinin riboside 5'-monophosphate phosphoribohydrolase LOG3-like | 1.061963108 | 0.39528383  | 0.624858094 | 0.962267238 | 0.660639649  | 1.28354867   | -1.42577280323031 | -0.142224133016843 |
| VIT_213s0064g00740 | <i>VvLOG 3-2</i> | cytokinin riboside 5'-monophosphate phosphoribohydrolase LOG3-like | 28.54551148 | 10.19444452 | 6.212827142 | 8.277503678 | -0.714461346 | -0.300515515 | -1.48548074604889 | -1.78599626081094  |
| VIT_218s0001g14030 | <i>VvLOG 3-3</i> | cytokinin riboside 5'-monophosphate phosphoribohydrolase LOG3-like | 87.74113455 | 0.908435055 | 0.210886846 | 0.037034143 | -2.106914265 | -4.61645554  | -6.5937261728508  | -11.2101817126606  |
| VIT_203s0038g03420 | <i>VvLOG 5-1</i> | cytokinin riboside 5'-monophosphate phosphoribohydrolase LOG5-like | 0.023       | 0.0367357   | 0.031269099 | 0.032947268 | -0.232445147 | -0.157023921 | 0.675548922137149 | 0.518525000964632  |
| VIT_218s0001g00210 | <i>VvLOG 5-2</i> | cytokinin riboside 5'-monophosphate phosphoribohydrolase LOG5-like | 2.118998898 | 0.160182203 | 1.136213785 | 0.047887713 | 2.826448542  | -1.741986422 | -3.7255970676583  | -5.46758348955197  |
| VIT_208s0007g02480 | <i>VvLOG 7</i>   | cytokinin riboside 5'-monophosphate phosphoribohydrolase LOG7-like | 3.176031061 | 0.082838722 | 0.035255789 | 0.037147919 | -1.232445147 | -1.157023921 | -5.2607759084521  | -6.41779982962461  |
| VIT_204s0008g01040 | <i>VvLOG 8-1</i> | cytokinin riboside 5'-monophosphate phosphoribohydrolase LOG8-like | 139.537303  | 5.892483421 | 7.583631097 | 4.988861568 | 0.364012992  | -0.240165156 | -4.56563124953577 | -4.80579640600854  |
| VIT_206s0004g00590 | <i>VvLOG 8-2</i> | cytokinin riboside 5'-monophosphate phosphoribohydrolase LOG8-like | 7.404239581 | 9.375892929 | 36.73374963 | 30.17693539 | 1.970078168  | 1.686418301  | 0.340604516844751 | 2.02702281796775   |
