# Supplementary material for: Genome-wide identification and characterization of gibberellin metabolic and signal transduction (GA MST) pathway mediating seed and berry development (SBD) in grape (Vitis vinifera L.)
Source: PubMed Central journal article supplement (PMC7441673; doi:10.1186/s12870-020-02591-1), 2020-08-21
Supplement: 12870_2020_2591_MOESM3_ESM.pdf [file 12870_2020_2591_MOESM3_ESM.pdf]

Additional file 3:Table S3 64 genes expression patterns of GA, auxin, ABA, and CK MST pathway in seed, berry skin, pericarp and flesh from a global transcriptomic atlas.

| Gene    | Sample_geo_accession | Green          | Stone     |         |         | Seed-V  | Seed-MR | Seed-FS | Seed-PFS | BerrySkin | BerrySkin | BerrySkin | BerrySkin | BerryPeric | BerryPeric | BerryPeri | BerryPeri | BerryFles | BerryFles | BerryFles | BerryFlesh |         |
|---------|----------------------|----------------|-----------|---------|---------|---------|---------|---------|----------|-----------|-----------|-----------|-----------|------------|------------|-----------|-----------|-----------|-----------|-----------|------------|---------|
|         |                      |                | -PFS      | -V      | -MR     |         |         |         |          | -R        | arp-FS    | arp-PFS   | carp-V    | carp-R     | h-PFS      | h-V       | h-MR      | -R        |           |           |            |         |
| GA      | <i>VvbHLH</i>        | 189.21934      | 29.7569   | 361.178 | 400.601 | 1312.08 | 1288.31 | 68.25   | 94.11    | 1026.00   | 3380.60   | 3145.91   | 3118.07   | 494.89     | 1769.39    | 4434.33   | 3534.21   | 389.27    | 3808.84   | 3646.64   | 2325.44    |         |
| MST     | <i>137</i>           | VitusP00103529 | 1177      | 5085    | 2431    | 5399    |         |         |          |           |           |           |           |            |            |           |           |           |           |           |            |         |
| pathway | <i>VvGA20o</i>       | VitusP00174271 | 525.36589 | 41.0303 | 3.76603 | 7.59939 | 324.03  | 1605.30 | 204.49   | 251.47    | 107.04    | 431.86    | 653.07    | 222.19     | 206.96     | 56.30     | 183.77    | 520.46    | 120.74    | 1042.22   | 1838.29    | 1581.22 |



|         |                                      |           |         |         |         |         |         |         |         |         |         |         |         |         |         |         |         |         |         |         |         |
|---------|--------------------------------------|-----------|---------|---------|---------|---------|---------|---------|---------|---------|---------|---------|---------|---------|---------|---------|---------|---------|---------|---------|---------|
|         | <i>VvGDI1</i>                        | 1056.0123 | 163.751 | 92.7787 | 98.0426 | 1744.44 | 1555.50 | 167.72  | 341.67  | 551.89  | 1906.84 | 2199.06 | 1270.95 | 268.25  | 545.13  | 1461.88 | 1932.51 | 426.46  | 2485.69 | 2321.99 | 1792.04 |
|         | <i>B</i> <i>VitusP00226521</i>       | 31597     | 9686    | 1026    | 9357    |         |         |         |         |         |         |         |         |         |         |         |         |         |         |         |         |
|         | <i>VvGID2-</i>                       | 495.76808 | 34.8415 | 21.6222 | 2.55216 | 128.53  | 55.63   | 672.41  | 583.50  | 108.39  | 54.02   | 50.19   | 181.50  | 397.95  | 168.87  | 90.10   | 191.44  | 86.84   | 42.78   | 66.71   | 140.16  |
|         | <i>1</i> <i>VitusP00227712</i>       | 2887      | 1885    | 7993    | 2413    |         |         |         |         |         |         |         |         |         |         |         |         |         |         |         |         |
|         | <i>VvGID2-</i>                       | 745.23533 | 81.0671 | 140.838 | 161.588 | 1365.97 | 1535.49 | 621.73  | 623.51  | 994.14  | 1649.31 | 1875.16 | 2040.80 | 882.13  | 1803.94 | 2166.34 | 2215.08 | 1559.08 | 2173.18 | 2214.20 | 2182.49 |
|         | <i>2</i> <i>VitusP00116243</i>       | 3411      | 0334    | 8632    | 3806    |         |         |         |         |         |         |         |         |         |         |         |         |         |         |         |         |
|         |                                      | 903.79502 | 14.0625 | 5.25743 | 16.8502 | 871.49  | 993.93  | 1133.54 | 1059.87 | 711.84  | 695.47  | 669.26  | 452.29  | 1047.11 | 574.68  | 873.86  | 994.66  | 995.89  | 848.90  | 1178.67 | 541.59  |
|         | <i>VvSPY1</i> <i>VitusP00252664</i>  | 6390      | 6675    | 5148    | 026     |         |         |         |         |         |         |         |         |         |         |         |         |         |         |         |         |
|         |                                      | 265.32799 | 8.26861 | 2.92150 | 2.44864 | 261.74  | 316.48  | 903.10  | 772.98  | 424.52  | 321.50  | 527.05  | 306.58  | 787.61  | 759.33  | 691.64  | 615.92  | 856.57  | 462.45  | 625.29  | 256.64  |
|         | <i>VvSPY2</i> <i>VitusP00099600</i>  | 4734      | 4575    | 476     | 6076    |         |         |         |         |         |         |         |         |         |         |         |         |         |         |         |         |
|         |                                      | 1511.6071 | 217.968 | 84.6379 | 56.0334 | 188.03  | 126.64  | 2145.82 | 1302.33 | 1729.30 | 1478.32 | 1789.95 | 827.94  | 2352.34 | 2346.39 | 1860.13 | 1190.18 | 1821.69 | 1158.96 | 1312.33 | 694.09  |
|         | <i>VvSLR1</i> <i>VitusP00015803</i>  | 82440     | 3021    | 5078    | 2144    |         |         |         |         |         |         |         |         |         |         |         |         |         |         |         |         |
|         | <i>CTK-HD</i> <i>VitusP00067090</i>  | 2.1189988 | 3.63368 | 0.66484 | 4.53817 | 25.70   | 28.36   | 66.51   | 359.91  | 60.56   | 46.24   | 24.23   | 145.17  | 30.21   | 65.43   | 37.86   | 186.57  | 30.58   | 45.80   | 33.38   | 101.37  |
|         | <i>2</i>                             | 98        | 8214    | 2474    | 5018    |         |         |         |         |         |         |         |         |         |         |         |         |         |         |         |         |
| CTK     | <i>VvLOG1-</i> <i>VitusP00216208</i> | 667.01255 | 31.2149 | 74.3217 | 42.5225 | 177.29  | 252.32  | 117.93  | 213.32  | 206.26  | 480.47  | 755.24  | 723.05  | 858.04  | 272.62  | 406.04  | 839.25  | 318.58  | 539.17  | 925.86  | 930.80  |
| MST     | <i>2</i>                             | 15        | 461     | 1798    | 2572    |         |         |         |         |         |         |         |         |         |         |         |         |         |         |         |         |
| pathway | <i>VvCKX5</i> <i>VitusP00119750</i>  | 2048.5960 | 145.288 | 6.16544 | 3.53739 | 65.60   | 26.53   | 2560.07 | 1995.95 | 3690.63 | 180.28  | 52.66   | 52.12   | 3056.83 | 3420.11 | 1393.66 | 133.29  | 3494.92 | 133.55  | 51.87   | 93.18   |
|         |                                      | 09        | 1069    | 9299    | 0906    |         |         |         |         |         |         |         |         |         |         |         |         |         |         |         |         |
|         | <i>VvARR22</i>                       |           | 42.7089 | 5.20885 | 0.05717 | 84.29   | 20.47   | 7.66    | 1152.88 | 11.82   | 8.52    | 9.52    | 10.64   | 90.47   | 18.01   | 19.69   | 11.81   | 5.97    | 11.99   | 8.11    | 6.77    |
|         | <i>-1</i> <i>VitusP00184550</i>      | 0.023     | 4272    | 5251    | 091     |         |         |         |         |         |         |         |         |         |         |         |         |         |         |         |         |
|         |                                      | 1525.3490 | 22.4640 | 5.42545 | 4.19648 | 1025.17 | 1219.58 | 2154.11 | 6.94    | 1551.46 | 397.60  | 544.056 | 232.04  | 2184.90 | 1947.69 | 615.45  | 359.86  | 1650.91 | 380.00  | 429.966 | 32.65   |
| Auxin   | <i>TIR1-3</i> <i>VitusP00226201</i>  | 22        | 3532    | 8545    | 148     |         |         |         |         |         |         | 7122    |         |         |         |         |         |         |         | 8094    |         |
| MST     | <i>ARF6-3</i> <i>VitusP00168670</i>  | 2811.7966 | 20.6112 | 2.37325 | 1.80425 | 426.07  | 429.23  | 2023.58 | 20.80   | 1253.23 | 292.48  | 252.260 | 272.73  | 1804.13 | 1163.21 | 419.71  | 247.16  | 931.54  | 208.04  | 151.872 | 106.46  |
| pathway |                                      | 64        | 2829    | 9107    | 1071    |         |         |         |         |         |         | 114     |         |         |         |         |         |         |         | 9468    |         |
|         | <i>VvARF18</i> <i>VitusP00077384</i> | 1639.5120 | 7.60947 | 0.33793 | 0.21760 | 184.91  | 214.00  | 1063.23 | 5.24    | 753.20  | 27.81   | 50.8826 | 78.11   | 1822.22 | 842.86  | 160.92  | 91.64   | 1597.48 | 46.69   | 70.3844 | 57.53   |



|         |                            |           |         |         |         |         |         |         |         |         |         |         |         |         |         |         |         |         |         |         |         |
|---------|----------------------------|-----------|---------|---------|---------|---------|---------|---------|---------|---------|---------|---------|---------|---------|---------|---------|---------|---------|---------|---------|---------|
|         | <i>VvEIN3-</i>             | 7813.8264 | 278.610 | 146.982 | 167.098 | 2395.71 | 2073.40 | 2161.29 | 1806.60 | 2608.59 | 2121.03 | 2459.59 | 1157.98 | 2222.03 | 2560.50 | 2213.25 | 2349.67 | 2712.44 | 1719.56 | 2006.56 | 965.07  |
|         | 3 <i>VitusP00044360</i>    | 39        | 6173    | 2717    | 2233    |         |         |         |         |         |         | 3237    |         |         |         |         |         |         | 3636    | 7264    |         |
|         | <i>NCED2-</i>              | 1789.6151 | 4.41378 | 0.59951 | 53.5675 | 243.96  | 63.57   | 986.87  | 97.90   | 622.44  | 558.05  | 215.93  | 73.55   | 2110.25 | 630.55  | 1382.16 | 659.83  | 939.06  | 752.79  | 647.33  | 62.24   |
|         | 1 <i>VitusP00004483</i>    | 77        | 5613    | 7243    | 2515    |         |         |         |         |         |         |         |         |         |         |         |         |         |         |         |         |
|         | <i>PYL9</i>                | 1893.2075 | 79.2187 | 75.7318 | 15.9078 | 1426.65 | 1072.04 | 959.40  | 369.59  | 689.71  | 328.22  | 379.52  | 707.09  | 589.31  | 565.60  | 345.41  | 658.28  | 197.23  | 276.50  | 399.53  | 786.69  |
|         | 1 <i>VitusP00076809</i>    | 1         | 1427    | 7205    | 0579    |         |         |         |         |         |         |         |         |         |         |         |         |         |         |         |         |
|         | <i>WRH1-2</i>              | 28.545511 | 28.2518 | 4.41977 | 0.33002 | 189.24  | 110.05  | 107.34  | 3063.82 | 179.12  | 96.93   | 75.43   | 116.32  | 96.40   | 174.68  | 131.89  | 344.15  | 42.68   | 72.77   | 45.66   | 93.81   |
|         | 48 <i>VitusP00044292</i>   | 48        | 9819    | 6866    | 2222    |         |         |         |         |         |         |         |         |         |         |         |         |         |         |         |         |
|         | <i>NCED1</i>               | 5051.7165 | 17.5465 | 4.10774 | 8.19416 | 436.73  | 150.06  | 374.15  | 38.56   | 464.04  | 242.66  | 219.10  | 112.03  | 1311.97 | 357.47  | 813.07  | 564.46  | 400.60  | 761.87  | 283.91  | 348.03  |
|         | 9 <i>VitusP00140314</i>    | 9         | 1529    | 3528    | 6006    |         |         |         |         |         |         |         |         |         |         |         |         |         |         |         |         |
| ABA     |                            | 424.94475 | 54.6323 | 133.175 | 69.8058 | 438.85  | 401.30  | 868.99  | 680.49  | 730.49  | 814.70  | 546.36  | 745.90  | 583.18  | 867.36  | 950.01  | 703.87  | 660.23  | 1387.43 | 671.64  | 1053.90 |
| MST     | <i>VvABA2</i>              | 32        | 7409    | 0148    | 215     |         |         |         |         |         |         |         |         |         |         |         |         |         |         |         |         |
| pathway | <i>VvABIS</i>              | 554.96370 | 41.2266 | 16.2707 | 21.5719 | 1031.97 | 795.72  | 1593.79 | 1763.31 | 1008.03 | 802.06  | 980.12  | 934.69  | 1457.53 | 986.40  | 822.79  | 887.14  | 1172.80 | 1012.37 | 1422.43 | 1213.02 |
|         | 2-2 <i>VitusP00187095</i>  | 17        | 5421    | 9477    | 5334    |         |         |         |         |         |         |         |         |         |         |         |         |         |         |         |         |
|         | <i>VvPP2C</i>              | 591.96096 | 127.933 | 78.2071 | 43.9197 | 1489.33 | 1549.05 | 821.26  | 1136.14 | 935.27  | 831.98  | 588.36  | 581.21  | 676.77  | 951.99  | 780.80  | 671.14  | 1013.05 | 835.93  | 828.80  | 602.01  |
|         | 39-1 <i>VitusP00130612</i> | 34        | 6405    | 0374    | 1861    |         |         |         |         |         |         |         |         |         |         |         |         |         |         |         |         |
|         | <i>VvPP2C</i>              | 1020.0721 | 56.4892 | 23.9204 | 25.8423 | 173.88  | 235.80  | 314.47  | 132.07  | 1292.49 | 709.46  | 659.86  | 945.58  | 794.05  | 1121.58 | 918.59  | 752.16  | 884.66  | 711.12  | 664.78  | 797.51  |
|         | 73-2 <i>VitusP00061301</i> | 35        | 3293    | 4799    | 0739    |         |         |         |         |         |         |         |         |         |         |         |         |         |         |         |         |
|         | <i>VvPP2C</i>              | 1810.7564 | 22.7757 | 52.1491 | 138.332 | 986.81  | 1103.37 | 945.68  | 488.12  | 456.21  | 2004.74 | 1579.63 | 863.60  | 717.44  | 641.52  | 1962.93 | 1747.65 | 539.75  | 1891.01 | 1430.82 | 876.24  |
|         | 24 <i>VitusP00213417</i>   | 7         | 5702    | 4976    | 173     |         |         |         |         |         |         |         |         |         |         |         |         |         | 0774    |         |         |
