# Supplementary material for: Genome-wide identification and characterization of gibberellin metabolic and signal transduction (GA MST) pathway mediating seed and berry development (SBD) in grape (Vitis vinifera L.)
Source: PubMed Central journal article supplement (PMC7441673; doi:10.1186/s12870-020-02591-1), 2020-08-21
Supplement: 12870_2020_2591_MOESM4_ESM.pdf [file 12870_2020_2591_MOESM4_ESM.pdf]

Additional file 4: Table S4 The primers sequences of GA MST pathway genes for qRT-PCR.

| Gene name          | Gene ID            | Forward primer sequences (5'-3') | Reverse primer sequences (5'-3') |
|--------------------|--------------------|----------------------------------|----------------------------------|
| <i>VvGA20ox1-1</i> | VIT_203s0063g01150 | ACTTCATCCGCCTCAATCAC             | GTGGGCTTAACTCGAATCCA             |
| <i>VvGA3ox4-1</i>  | VIT_204s0008g04920 | CGTTTTCCGGTTGATGAAGT             | CGTTTTCCGGTTGATGAAGT             |
| <i>VvGA2ox1-1</i>  | VIT_219s0140g00120 | TTGAAGCCTGCCAAGAGTTT             | GAAGGTACTCAACCCGACCA             |
| <i>VvGID1B</i>     | VIT_207s0104g00930 | GGTTCCGCTCAATACTTGGA             | TGGTAAACCCGGTTGAGAAG             |
| <i>VvGAI 1-4</i>   | VIT_214s0006g00640 | CCGGTGTTTCTGGACAGATT             | CAGTGTCTCGTGCCTCTCAA             |
| <i>VvSLR1</i>      | VIT_211s0016g04630 | CGCCATAAATCAGACGGTTT             | TGACTCAGCACACGTCATCA             |
| <i>VvActin</i>     | VIT_208s0032g00900 | GCTCGCTGTTTTGCAGTTCTAC           | AACATAGGTGAGGCCGCACTT            |
