# Supplementary material for: Genome-wide identification and characterization of gibberellin metabolic and signal transduction (GA MST) pathway mediating seed and berry development (SBD) in grape (Vitis vinifera L.)
Source: PubMed Central journal article supplement (PMC7441673; doi:10.1186/s12870-020-02591-1), 2020-08-21
Supplement: 12870_2020_2591_MOESM5_ESM.pdf [file 12870_2020_2591_MOESM5_ESM.pdf]

Additional file 5: Table S5 The name, stage and type of data used in this study

| Name         | Details                                                                                                                                              |
|--------------|------------------------------------------------------------------------------------------------------------------------------------------------------|
| Name of data | Transcriptomic study of biological networks involving grapevine berry development                                                                    |
| Type of data | Expression profiling by high throughput sequencing                                                                                                   |
| Stage        | Three developmental stages from the berry of grapevines ( <i>Vitis vinifera</i> ) are respectively 40 days after flowering (DAF), 65 DAF and 90 DAF. |
